# Supplementary material for: Comparison of the transcriptomes of two tardigrades with different hatching coordination
Source: BMC Dev Biol. 2019 Dec 9;19:24. doi: 10.1186/s12861-019-0205-9 (PMC6925440; doi:10.1186/s12861-019-0205-9)
Supplement: Supplementary file 10 — Additional file 9: Table S1. Summary of RNA-Seq data. [file 12861_2019_205_MOESM9_ESM.xlsx]

## Sheet: Sheet1
Table S1 Summary of RNA-Seq data
			H. exemplaris		R. varieornatus
Stage	Day	ID	Number of Reads	Mapping ratio	Number of Reads	Mapping ratio
Embryo	1	E1-1	8822054	0.4741	11688367	0.4432
	1	E1-2	10286604	0.4917	13064048	0.4049
	1	E1-3	8319242	0.456	13389666	0.3765
	2	E2-1	11794526	0.3791	12702879	0.2038
	2	E2-2	11086054	0.3959	14385811	0.2152
	2	E2-3	10151210	0.4208	13101271	0.1917
	3	E3-1	10057550	0.4173	14348899	0.244
	3	E3-2	9253951	0.3634	13640410	0.215
	3	E3-3	11871780	0.379	8817117	0.1759
	4	E4-1	11622113	0.363	12606663	0.1813
	4	E4-2	12386383	0.3842	15271225	0.1182
	4	E4-3	9654776	0.3439	12517722	0.1159
	5	E5-1	11921100	0.3954	12599958	0.0737
	5	E5-2	11569382	0.4381	14476417	0.0207
	5	E5-3	10503387	0.4294	17324895	0.0364
Juvenile	1	B1-1	12440551	0.4715	4811886	0.4239
	1	B1-2	12306138	0.2703	6210798	0.4614
	1	B1-3	12734126	0.3231	5637785	0.475
	2	B2-1	13107156	0.1769	13180143	0.3447
	2	B2-2	14437609	0.1351	12954906	0.483
	2	B2-3	13870809	0.1387	14582323	0.451
	3	B3-1	8360076	0.3257	14650261	0.4544
	3	B3-2	6542790	0.2453	13978468	0.4219
	3	B3-3	9775113	0.2838	16490072	0.4582
	4	B4-1	9824335	0.2983	13590710	0.4414
	4	B4-2	16666875	0.1937	13075961	0.4012
	4	B4-3	15995271	0.2119	14390604	0.4357
	5	B5-1	6928823	0.3079	13725567	0.4215
	5	B5-2	8857975	0.2478	13794248	0.3991
	5	B5-3	12901947	0.2609	13559155	0.4212
	6	B6-1	9843726	0.3775	16517715	0.5024
	6	B6-2	12913346	0.3881	14203625	0.3603
	6	B6-3	11745564	0.3243	13279602	0.364
	7	B7-1	12384307	0.3891	13787335	0.4384
	7	B7-2	9182107	0.4105	13605441	0.4413
	7	B7-3	13626269	0.4116	14745727	0.1375
Adult	-	Active-1	11399144	0.4757	12146289	0.5268
	-	Active-2	10744670	0.4553	11076841	0.5449
	-	Active-3	10939323	0.4359	11211443	0.4973
	-	Tun-1	10325677	0.3606	11781529	0.4514
	-	Tun-2	10689489	0.3811	11966104	0.4666
	-	Tun-3	10455913	0.3983	12361848	0.4931
* Data sequenced in this study are highlighted in grey.
